# Supplementary material
Source: publisher figshare collection journal article supplement (https://tandf.figshare.com/ndownloader/files/18548678)
Supplement: Supplementary file 1 [file 18548678]

## Sheet: Asco
	Insertion sites ->			nad5-37	nad5-168	nad5-248	nad5-260	nad5-324	nad5-417	nad5-426	nad5-522	nad5-570	nad5-672	nad5-684	nad-706	nad5-710	nad5-715	nad5-717	nad5-744	nad5-747	nad5-755	nad5-758	nad5-924	nad5-934	nad5-954	nad5-1000	nad5-1005	nad5-1032	nad5-1065	nad5-1152	nad5-1479	nad5-1878
Taxanomic postion	GenBank Accession number	Species	Phase	1	0	2	2	0	0	0	0	0	0	0	1	2	1	0	0	0	2	2	0	1	0	1	0	0	0	0	0	0
			Introns
Sordariales	KC683708.1	Neurospora crassa	2					IC2-LAG										IB-LAG
	JQ015302.1	Madurella mycetomatis	1																				IB-LAG
	NC_001329.3	Podospora anserina	4			ID-LAG		IC2-LAG				IB-LAG	gII-RT
Xylariales	KF545917.1	Annulohypoxylon stygium	5					IC2-LAG		ID-LAG		IB-LAG				TWIN-ID							IB-LAG
	J235TASD1	Microdochium bolleyi	1																				IB-LAG
Microascales	JX185564.1	Ceratocystis cacaofunesta	8			ID-LAG	ID-LAG	IC2-LAG												IC2-LAG		IB-LAG	IB-LAG			IB-GIY			IA-LAG
	MH551223.1	Endoconidiophora resinifera	7			ID-LAG								IB-LAG		ID		IB-LAG		IC2		IB-LAG								IC2
Glomerellales	CM001021.1	Glomerella graminicola	1															IB-LAG
	CBS131602	Colletotrichum caudatum	1															IB-LAG
Hypocreales	KP827647.1	Fusarium culmorum	1															IB-LAG
	KM486533.1	Fusarium gerlachii	1															IB-LAG
	AY945289.1	Fusarium oxysporum	1															IB-LAG
	KR139916.1	Hirsutella minnesotensis	1													ID
	FO082257.1	Claviceps purpurea	1						IB
Peltigerales	JN088165.1	Peltigera membranacea	3							ID-LAG						ID		IB-LAG
	JN088164.1	Peltigera malacea	1																				IB-LAG
Saccharomycetales	GQ354526.1	Dekkera bruxellensis	1															IB
	EF536359.1	Candida viswanathii	1															IB
	KF017574.1	Candida chauliodes	1															IB
	KC993176.1	Meyerozyma guilliermondii	1															IB
	FN356025.1	Pichia farinosa	2															IB-LAG					IB-LAG
	KC993182.1	Pichia kluyveri	1																				IB-LAG
	AJ307410	Yarrowia lipolytica	2															IB-LAG					IB-LAG
Onygenales	AY916130.1	Epidermophyton floccosum	2															IB-LAG					IB-LAG
	NW_003101581.1	Ajellomyces dermatitidis	2					IC2															IB-LAG
Pleosporales	EU053989.1	Phaeosphaeria nodorum	1					IC2-LAG
		Pleomassaria siparia	7			ID-LAG		IC2-LAG	IB-LAG							ID		IB-GIY/LAG					IB-LAG			IB-LAG
	CBS_107.79	Bimuria novae-zelandiae	3					IC2-LAG	IB-LAG			IB
	CBS_304.34	Mytilinidion resinicola	1					IC2-LAG
	CBS_161.51	Clathrospora elynae	3					IC2-LAG																		IB-GIY					IC2-LAG
		Melanomma pulvis-pyrius	1					IC2-LAG
	CBS_113818	Ophiobolus disseminans	2					IC2-LAG																		IB-GIY
	HMLAC05119	Ampelomyces quisqualis	3					IC2-LAG															IB-LAG								IC2-LAG
		Decorospora gaudefroyi	4									IB-LAG											IB-LAG			IB-GIY					IC2-LAG
		Lophiostoma macrostomum	1																							IB-GIY
	AP3s5-JAC2a	Paraconiothyrium sporulosum	2									IB						IB
		Corynespora cassiicola	1															IB-LAG
		Pyrenochaeta sp.	1																				IB-LAG
	CBS_110217	Setomelanomma holmii	1																				IB-LAG
	CBS_379.55	Westerdykella ornata	1																				IB-LAG
Incertae sedis	KF650575.1	Rhynchosporium secalis	2																			IB-LAG	IB-LAG
		Rhynchosporium agropyri	2																			IB-LAG	IB-LAG
		Lepidopterella palustris	2					IC2-LAG				IB-LAG
	CBS_542.76	Lizonia empirigonia	4					IC2-LAG				IB-LAG						IB-LAG					IB-LAG
	CBS_525.71	Macroventuria anomochaeta	3					IC2-LAG										IB-LAG					IB-LAG
		Phyllosticta citriasiana	5			ID-LAG		IC2-LAG	IB-LAG			IB-LAG				ID-rps3
		Clohesyomyces aquaticus	1																												IC2-LAG
Helotiales	KJ434027.1	Sclerotinia borealis	4			ID-LAG		IC2-LAG								ID		IB-GIY/LAG
	CBS118.31	Bulgaria inquinans	8					IC2-LAG		ID-LAG		IB-LAG				ID			IC2				IB-LAG			IB-GIY				IC2-LAG
	CBS235.53	Loramyces macrosporus	5					IC2-LAG		ID-LAG								IB-LAG				IB-LAG	IB-LAG
	MK550697	Dactylella sp.	10	IA				IC2-LAG	IB-LAG			IB-LAG				ID		IB-LAG				IB	IB-LAG						IA-LAG	IC2-LAG
	MK550698	Drechslerella brochopaga	6	IA	IC2-LAG				IB							ID		IB-LAG			IC2
Diaporthales	AF456838.1	Cryphonectria parasitica	2			ID-LAG		TWIN-IC2/gII-LAG
	CBS_116597	Lollipopaia minuta	4					IC2-LAG										IB-LAG					IB-LAG			IB-GIY
Ophiostomatales	MG020143.1	Ophiostoma novo-ulmi	1					IC2-LAG
	PCDN01000199.1	Ceratocystiopsis brevicomis	2			ID-LAG		IC2-LAG
	LZPB01000172.1	Ceratocystiopsis minuta	1															IB-LAG
	PCDJ01000011.1	Raffaelea albimanens	9			ID-LAG		IC2-LAG		ID-LAG		IB-LAG				ID		IB-LAG/GIY					IB-LAG			IB-GIY				IC2-LAG
	PCDH01000124.1	Raffaelea arxii	4			ID-LAG		IC2-LAG				IB-LAG											IB-LAG
	PCDE01000018.1	Raffaelea quercivora (nad5 copy2)	5			ID-LAG		IC2-LAG				IB-LAG						IB-LAG												IC2-LAG
Pezizales	KU707476.1	Pyronema omphalodes	4						IB										IC2			IB				IB
	120613	Choiromyces venosus	7			ID		IC2-LAG	IB-GIY	ID-LAG		IB-LAG										IB-LAG									IC2-LAG
	ATCC_42695	Caloscypha fulgens	6					IC2-GIY/LAG		ID		IB				ID-LAG			IC2			IB-LAG
Capnodiales	CBS_121739	Pseudovirgaria hyperparasitica	6					IC2-LAG	IB-LAG							ID-LAG		IB-LAG					IB-LAG						IA
	SO2202	Septoria musiva	2					IC2-LAG														IB-LAG
	CBS_116005	Teratosphaeria nubilosa	6					IC2				IB				ID-LAG		IB-LAG				IB-LAG	IB-LAG
		Cercospora zeae-maydis	2															IB-LAG					IB-LAG
Lindgomyces	ATCC_200398	Lindgomyces ingoldianus	6					IC2-LAG	IB-LAG							ID-LAG		IB-LAG					IB-LAG			IB-GIY
Myriangiales	CECT_20119	Elsinoe ampelina	1															IB-LAG
Microthyriales	CBS_130266	Tothia fuscella	1															IB-LAG
Mytilinidiales	CBS_269.34	Lophium mytilinum	1																				IB-LAG
Mycosphaerellales		Mycosphaerella fijiensis	1																				IB-LAG
Rhytismatales	CBS_202.91	Coccomyces strobi	8			ID -LAG	ID-LAG			ID-LAG						ID		IB-LAG					IB-LAG					IB		IC2-LAG
Lulworthiales	JK4322	Lindra thalassiae	7			ID-LAG		IC2-LAG				IB-LAG						IB-LAG				IB-LAG	IB-LAG									IC2
Magnaporthales	ATCC_64411	Magnaporthiopsis poae	4			ID-LAG		IC2-LAG		ID-LAG		IB-LAG
Eurotiales	ITEM_5010	Aspergillus carbonarius	2									IB-LAG										IB-LAG
Thelebolales	ATCC_90970	Thelebolus microsporus	1															IB-LAG
			229	2	1	15	2	36	10	9	0	19	1	1	0	16	0	37	3	2	1	13	34	0	0	11	0	1	3	6	5	1	229
Basidiomycota
				nad5-37	nad5-168	nad5-248	nad5-260	nad5-324	nad5-417	nad5-426	nad5-522	nad5-570	nad5-672	nad5-684	nad5-706	nad5-710	nad5-715	nad5-717	nad5-744	nad5-747	nad5-755	nad5-758	nad5-924	nad5-934	nad5-954	nad5-1000	nad5-1005	nad5-1032	nad5-1065	nad5-1152	nad5-1479	nad5-1878
			Phase	1	0	2	2	0	0	0	0	0	0	0	1	2	1	0	0	0	2	2	0	1	0	1	0	0	0	0	0	0
			Introns
Agaricales	JF799107.1	Flammulina velutipes	2					IC2-LAG										IB-cox3
	HQ259115.1	Moniliophthora roreri	2					IC2-LAG																				IB-LAG
	JX271275.1	Agaricus bisporus	5						IB-LAG	ID-LAG							IC2	IB-LAG									gII-GIY
Polyporales	KF673550.1	Ganoderma sinense	2					IC2-LAG		ID-LAG
	HF570115.2	Ganoderma lucidum	2					IC2-LAG		ID-LAG
	KP410262.1	Ganoderma meredithae	2							ID-LAG															IB-LAG
	HE613568.1	Phlebia radiata	6					IC2	IB	ID-LAG	IC2-LAG							IB-LAG						IB-GIY
Russulales	KF957635.1	Heterobasidion irregulare	1															IB
Ustilaginales	DQ157700.1	Ustilago maydis	1												IA
Microstromatales	KC628747.1	Jaminaea angkoriensis	1															IB-LAG
Microbotryales	KC285586.1	Microbotryum lychnidis	3						IB									IB								IB
	FQ311469.1	Sporisorium reilianum	3						IB-LAG						IA			IB-LAG
Tilletiales	DQ993184.1	Tilletia indica	2						IB-LAG									IB-LAG
	EF536375.1	Tilletia walkeri	2						IB-LAG									IB-LAG
			34	0	0	0	0	5	6	5	1	0	0	0	2	0	1	9	0	0	0	0	0	1	1	1	1	1	0	0	0	0	34
Zygomycota
				nad5-37	nad5-168	nad5-248	nad5-260	nad5-324	nad5-417	nad5-426	nad5-522	nad5-570	nad5-672	nad5-684	nad-706	nad5-710	nad5-715	nad5-717	nad5-744	nad5-747	nad5-755	nad5-758	nad5-924	nad5-934	nad5-954	nad5-1000	nad5-1005	nad5-1032	nad5-1065	nad5-1152	nad5-1479	nad5-1878
			Phase	1	0	2	2	0	0	0	0	0	0	0	1	2	1	0	0	0	2	2	0	1	0	1	0	0	0	0	0	0
			Introns
Mucorales	KM382275.1	Parasitella parasitica	1															IB-LAG
	KR809878.1	Phycomyces blakesleeanus	1															IB-LAG
			2
